# Supplementary material for: MXene-based separators for redox-enhanced electric capacitors with a suppressed shuttle effect and self-discharge: the effect of MXene ageing
Source: Royal Society of Chemistry journal article supplement (doi:10.1039/d2nj05439f), 2023-01-01
Supplement: d2nj05439f1.pdf [file d2nj05439f1.pdf]

## Supporting Information

### MXene-Based Separators for Redox-enhanced Electric Capacitors with Suppressed Shuttle Effect and Self-discharge: the Effect of MXene Ageing

Qiankun Han<sup>a,b</sup>, Wei Yang<sup>b</sup>, Wenshi Li<sup>b</sup>, Maosheng Wu<sup>b</sup>, Jing Yao<sup>a,b</sup>, Man Zhao<sup>b</sup>,  
Xianmao Lu<sup>a,b\*</sup>

<sup>a</sup> Center on Nanoenergy Research, School of Physical Science and Technology, School of Resources, Environment and Materials, Guangxi University, Nanning, Guangxi, 530004, China

<sup>b</sup> Beijing Institute of Nanoenergy and Nanosystems, Chinese Academy of Sciences, Beijing 100083, P. R. China; School of Nanoscience and Technology, University of Chinese Academy of Sciences, Beijing 100049, P. R. China

\*Corresponding author. E-mail: [luxianmao@binn.cas.cn](mailto:luxianmao@binn.cas.cn)

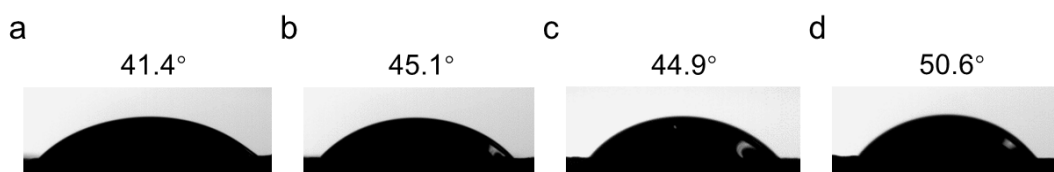

**Figure S1** Water contact angles on the surfaces of  $\text{Ti}_3\text{C}_2\text{T}_x$ ,  $\text{Ti}_3\text{C}_2\text{T}_x$ -4h,  $\text{Ti}_3\text{C}_2\text{T}_x$ -8h, and  $\text{Ti}_3\text{C}_2\text{T}_x$ -12h films.

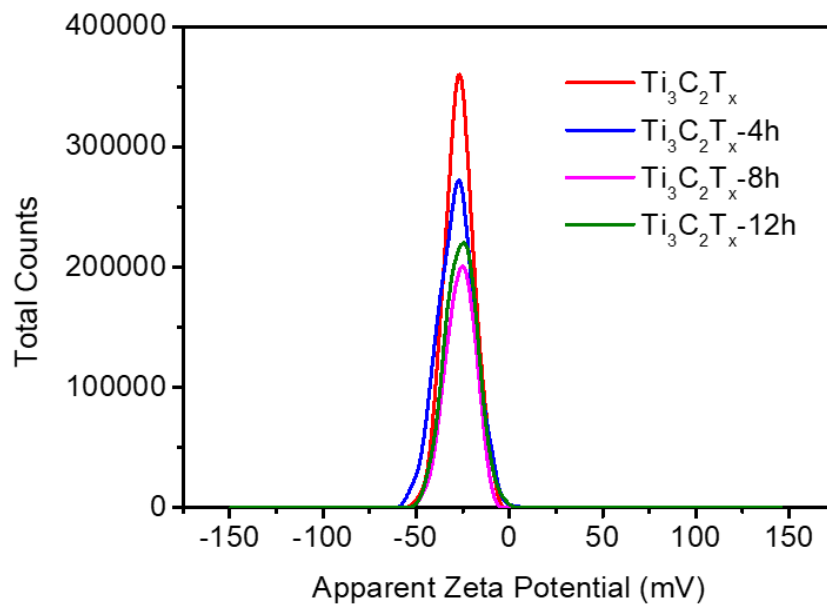

**Figure S2** Zeta potential distributions of  $Ti_3C_2T_x$ ,  $Ti_3C_2T_x-4h$ ,  $Ti_3C_2T_x-8h$ , and  $Ti_3C_2T_x-12h$ .
